# Supplementary material
Source: PubMed Central journal article supplement (PMC5826637)
Supplement: NIHMS940416-supplement-01.pdf [file NIHMS940416-supplement-01.pdf]

Calcium-resistant

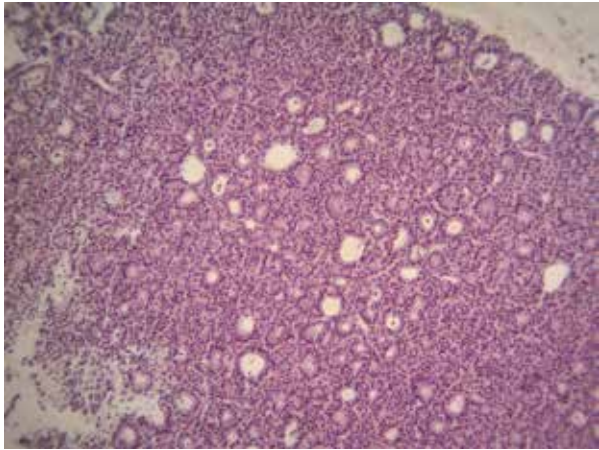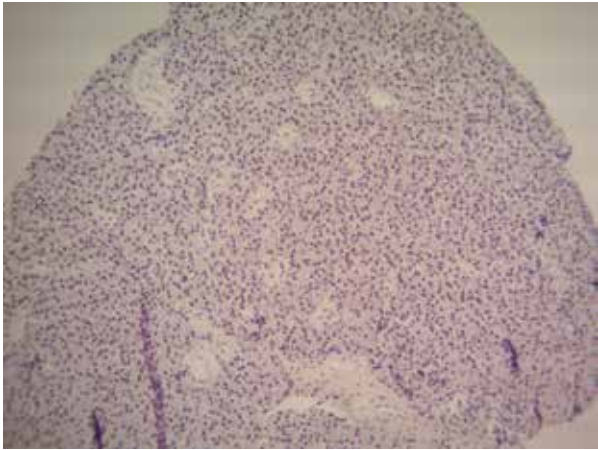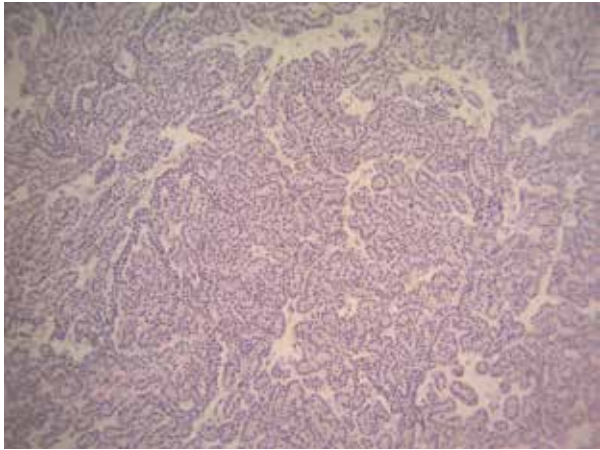

Calcium-sensitive

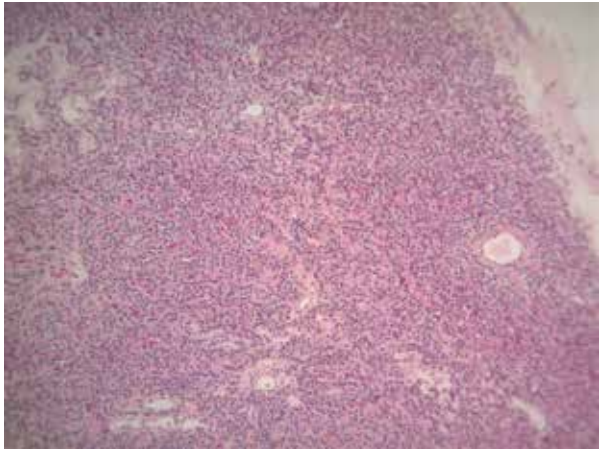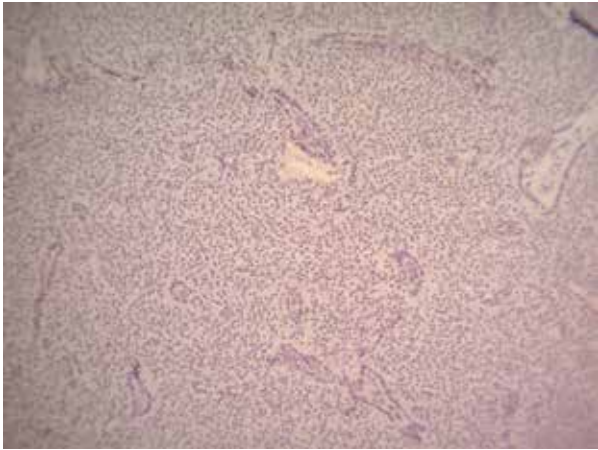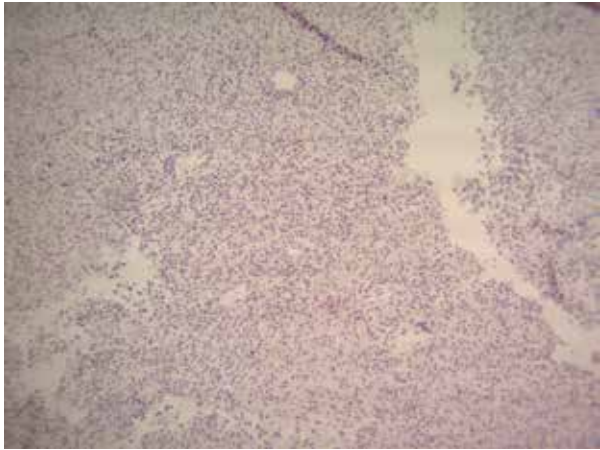

**Figure S1.** Tumor architecture of specimens subjected to RNAseq analysis. Images are hematoxylin-eosin stained, 5 micron sections of formalin-fixed, paraffin-embedded tumors. Magnification is 100X.
