# Supplementary material
Source: PubMed Central journal article supplement (PMC5826637)
Supplement: NIHMS940416-supplement-03.pdf [file NIHMS940416-supplement-03.pdf]

## Calcium-resistant

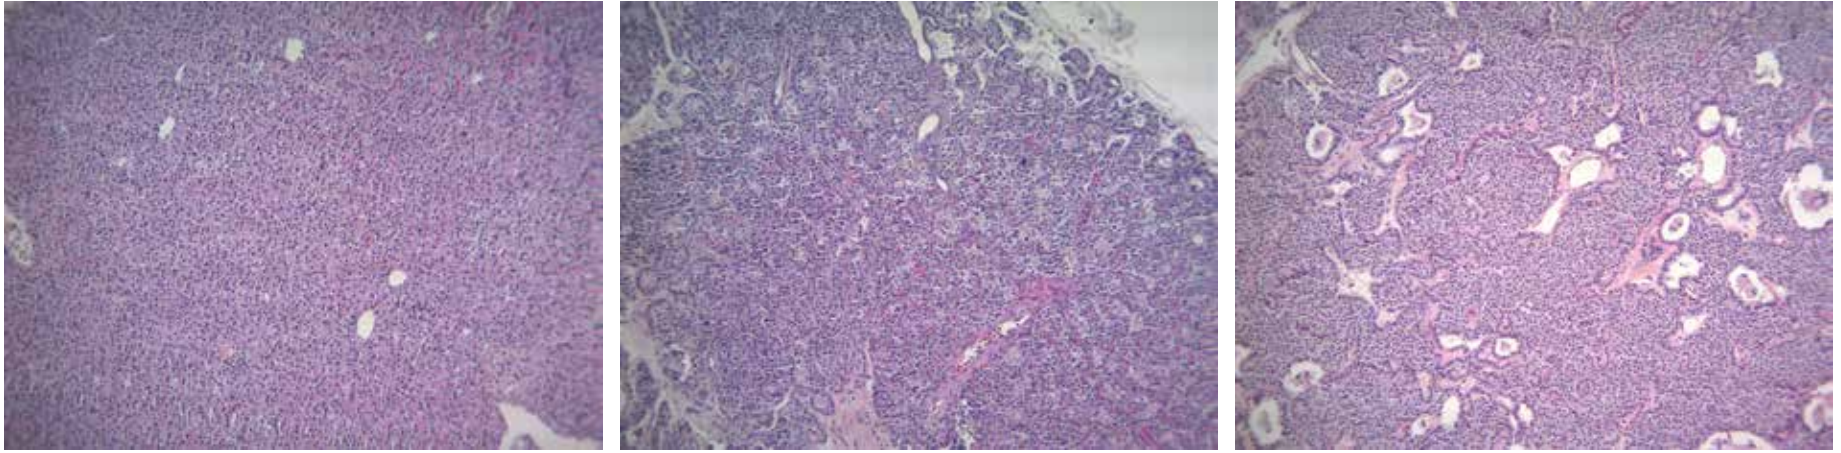

## Calcium-sensitive

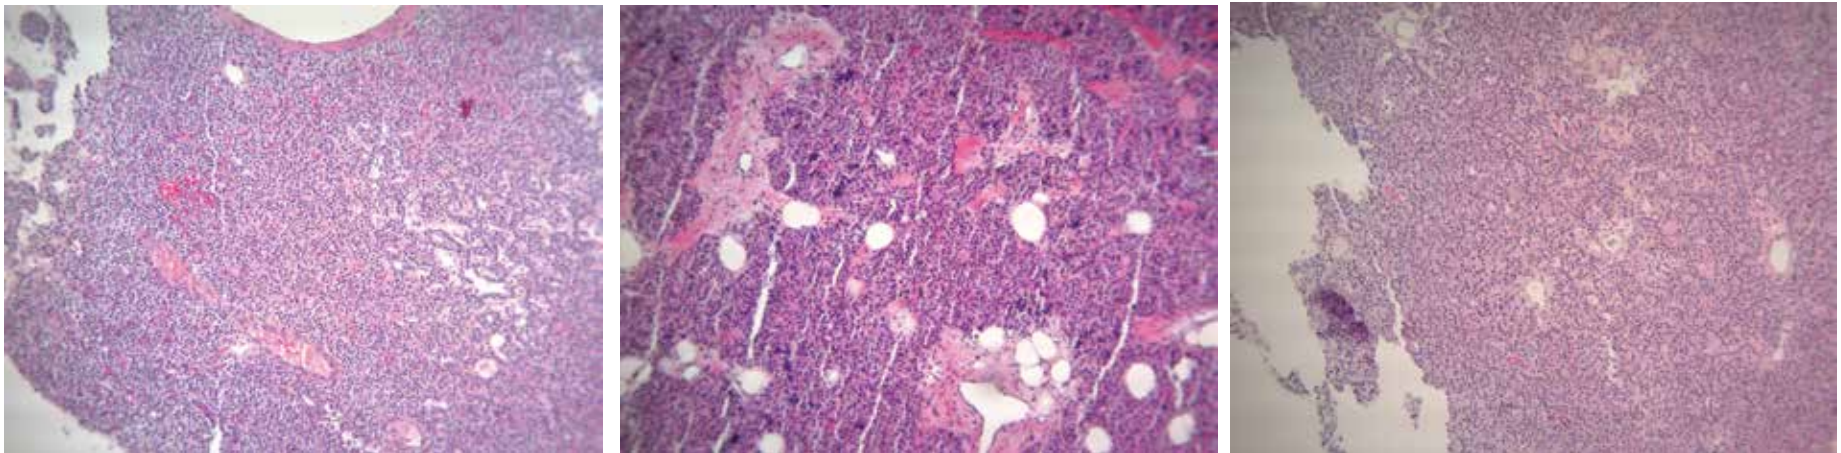

**Figure S3.** Tumor architecture of specimens subjected to proteomics analysis. Images are hematoxylin-eosin stained, 5 micron sections of formalin-fixed, paraffin-embedded tumors. Magnification is 100X.
