# Supplementary material
Source: PubMed Central journal article supplement (PMC5826637)

## CASR

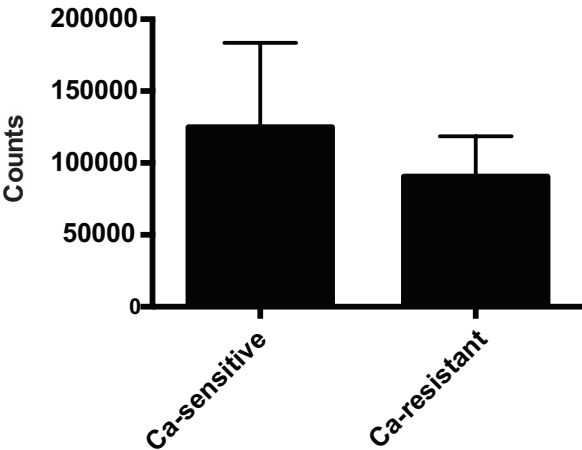

$p = 0.141$

$q = 0.683$

## PTH

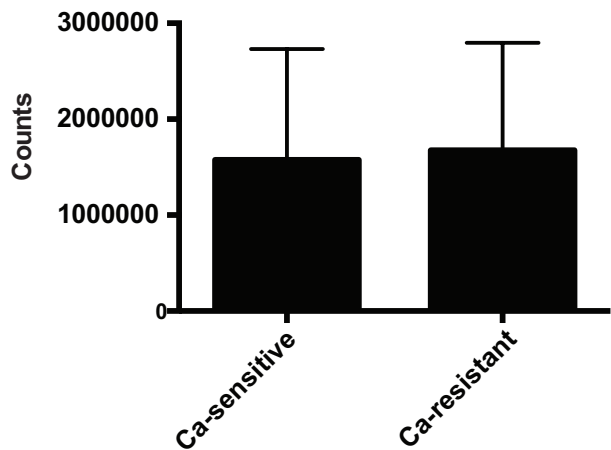

$p = 0.935$

$q = 0.995$

Supplement: NIHMS940416-supplement-02.pdf [file NIHMS940416-supplement-02.pdf]

## FFPE Technical Replicates

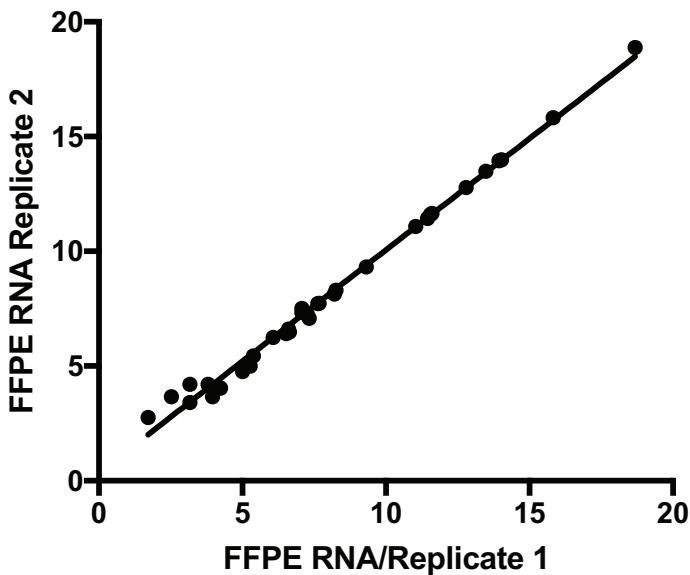

$R^2 = 0.9966$

$p < 0.0001$

Supplement: NIHMS940416-supplement-04.pdf [file NIHMS940416-supplement-04.pdf]

# Nanostring Quantitation

## Intact RNA v FFPE RNA

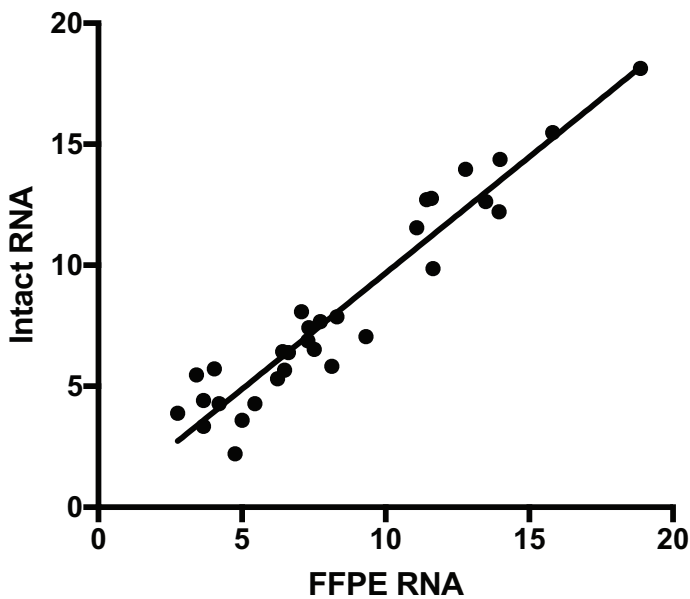

$R^2 = 0.9153$

$p < 0.0001$

Supplement: NIHMS940416-supplement-05.pdf [file NIHMS940416-supplement-05.pdf]

## Nanostring vs RNAseq

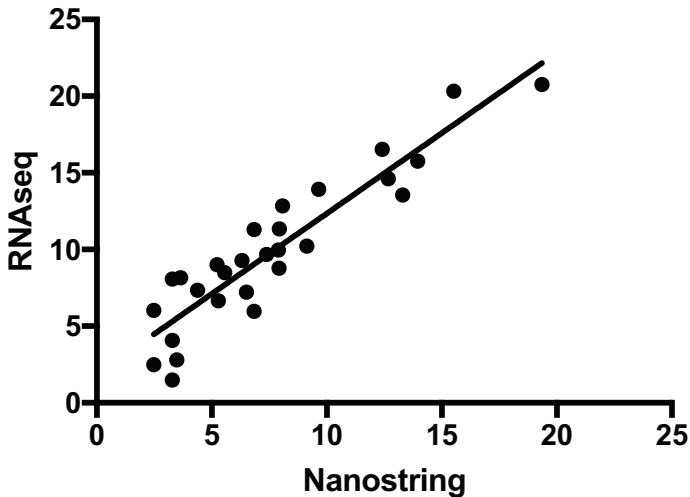

$R^2 = 0.8513$

$p < 0.0001$

Supplement: NIHMS940416-supplement-06.pdf [file NIHMS940416-supplement-06.pdf]
